# Supplementary material for: Measuring Organization of Large Surficial Clasts in Heterogeneous Gravel Beach Sediments
Source: MDPI journal article supplement (doi:10.3390/jmse10040525), 2022-04-11
Supplement: s1 [file s1]

# Measuring Organization of Large Surficial Clasts in Heterogeneous Gravel Beach Sediments

## Supplemental Information

**Supplemental Table S1.** Treatment status, tidal elevation, mean particle size, and cobble/pebble/granule content values for surficial sediments at study beaches in western Prince William Sound. Sites are ordered from north (Disk Island) to south (Latouche Island). m MLLW = meters above mean low-low water. Variance measures: <sup>a</sup>: standard deviation; <sup>b</sup>: standard error.

| Site Designation | Treatment Status  | Approximate Tidal Elevation (m MLLW) | Mz (mm) | % Cobble / Pebble/ Granule |
|------------------|-------------------|--------------------------------------|---------|----------------------------|
| DI66             | Washed (observed) | 0.03                                 | 20.20   | 98.2                       |
| DI67A            | Washed (observed) | -0.3                                 | 20.25   | 89.7                       |
| DI67B            | Washed (observed) | 0.61                                 | 6.52    | 70.3                       |
| IN32             | Washed (observed) | 0.43                                 | 30.98   | 95.1                       |
| KN103A           | Washed (presumed) | 0.34                                 | 25.11   | 89.8                       |
| KN103B           | Washed (presumed) | 0.09                                 | 28.02   | 89.1                       |
| KN104            | Washed (presumed) | -0.18                                | 8.04    | 78.2                       |
| KN118            | Washed (presumed) | 0.21                                 | 23.88   | 96.8                       |
| KN106A           | Washed (presumed) | -0.09                                | 8.48    | 68.9                       |
| KN106B           | Washed (presumed) | -0.15                                | 23.10   | 90.0                       |
| KN502            | Washed (presumed) | 0.21                                 | 10.84   | 80.0                       |
| KN130            | Washed (presumed) | -0.52                                | 17.93   | 86.8                       |
| KN131A           | Washed (presumed) | 0.3                                  | 4.95    | 66.2                       |
| KN131B           | Washed (presumed) | -0.64                                | 3.31    | 55.5                       |
| KN133            | Washed (presumed) | 0                                    | 10.59   | 78.1                       |
| KN507            | Unwashed          | -0.21                                | 9.53    | 87.6                       |
| CH9              | Washed (presumed) | -0.15                                | 7.08    | 72.2                       |
| KN5              | Washed (presumed) | 0.43                                 | 13.10   | 79.5                       |
| KN208            | Unwashed          | -0.06                                | 8.04    | 76.1                       |
| KN553            | Unwashed          | 0.94                                 | 3.01    | 58.3                       |
| CH7A             | Unwashed          | -0.15                                | 7.57    | 78.7                       |
| CH7B             | Unwashed          | -0.4                                 | 5.04    | 72.3                       |
| KN554A           | Unwashed          | -0.21                                | 9.03    | 65.6                       |
| KN554B           | Unwashed          | 0                                    | 10.95   | 41.7                       |
| SL1              | Unwashed          | 0.24                                 | 5.17    | 65.1                       |
| KN575            | Unwashed          | 0.6                                  | 15.38   | 44.3                       |
| FL4A             | Washed (presumed) | -0.3                                 | 19.32   | 84.6                       |
| FL4B             | Washed (presumed) | 0.06                                 | 11.21   | 76.3                       |
| FL3A             | Unwashed          | -0.3                                 | 3.14    | 58.7                       |
| FL3B             | Unwashed          | -0.55                                | 10.53   | 67.1                       |
| FL3C             | Unwashed          | 0.27                                 | 12.17   | 58.7                       |
| EV16             | Washed (presumed) | 0.18                                 | 20.30   | 87.8                       |
| EV21             | Washed (observed) | 0.09                                 | 16.72   | 81.8                       |

|         |                   |                        |                          |                        |
|---------|-------------------|------------------------|--------------------------|------------------------|
| EV8     | Unwashed          | -0.03                  | 13.63                    | 67.6                   |
| EV70    | Unwashed          | 0.21                   | 11.53                    | 32.1                   |
| LA16    | Washed (observed) | 0.03                   | 37.07                    | 97.3                   |
| LA18    | Washed (observed) | 0.08                   | 51.85                    | 99.9                   |
| Mean±SD |                   | 0.03±0.34 <sup>a</sup> | 14.69±10.34 <sup>a</sup> | 75.3±16.3 <sup>a</sup> |
